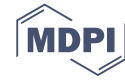

Article

# Computational modeling of the photon transport, tissue heating, and cytochrome C oxidase absorption during transcranial near-infrared stimulation

Mahasweta Bhattacharya <sup>1,†</sup>, and Anirban Dutta <sup>1,†</sup>

<sup>1</sup> University at Buffalo SUNY; mahaswet@buffalo.edu

<sup>2</sup> University at Buffalo SUNY; anirband@buffalo.edu

Version July 16, 2019 submitted to Brain Sci.

**Abstract:** Transcranial near-infrared stimulation (tNIRS) has been proposed as a tool to modulate cortical excitability. However, the underlying mechanisms are not clear where the heating effects on the brain tissue needs investigation due to increased near-infrared (NIR) absorption by water and fat. Moreover, the risk of localized heating of tissues (including the skin) during optical stimulation of the brain tissue is a concern. The challenge in estimating localized tissue heating is due to the light interaction with the tissues' constituents, which is dependent on the combination ratio of the scattering and absorption properties of the constituent. Here, apart from tissue heating that can modulate the cortical excitability ("photothermal effects"); the other mechanism reported in the literature is the stimulation of the mitochondria in the cells which are active in the adenosine triphosphate (ATP) synthesis. In the mitochondrial respiratory chain, the complex IV, also named as the cytochrome c oxidase (CCO), is the unit four with three copper atoms. The absorption peaks of CCO are in the visible (420-450nm and 600-700nm) and the near-infrared (760-980nm) spectral region which have been shown to be promising for low level light therapy (LLLT), also known as "photobiomodulation". While much higher CCO absorption peaks in the visible spectrum can be used for the photobiomodulation of the skin, 810nm has been proposed for the non-invasive brain stimulation (using tNIRS) due to the optical window in the NIR spectral region. In this article, we applied a computational approach to delineate the "photothermal effects" from the "photobiomodulation," i.e., to estimate the amount of light absorbed individually by each chromophore in the brain tissue (with constant scattering) and the related tissue heating. Photon migration simulations were performed for motor cortex tNIRS based on a prior work that used a 500mW cm<sup>-2</sup> light source placed on the scalp. We simulated photon migration at 630nm and 700nm (red spectral region) and 810nm (near-infrared spectral region). We found a temperature increase in the scalp below 0.25 ° C and a minimal temperature increase in the gray matter less than 0.04 ° C at 810nm. Similar heating was found for 630nm and 700nm used for LLLT, so photothermal effects are postulated to be unlikely in the brain tissue.

**Keywords:** chromophore; finite element method; near-infrared, cytochrome c oxidase

## 1. Introduction

Near-infrared (NIR) light has been reported to be able to penetrate the extra-cranial layers like scalp, skull, cerebrospinal fluid and reach the superficial layers of the cerebral cortex due to the optical window. It has been hypothesized that interaction of NIR light with cytochrome c oxidase (CCO) can potentiate the CCO in the mitochondria, a component of the electron transport chain and key complex in energy production[1]. CCO is the primary chromophore in the mitochondria besides the calcium-ion channel (possibly mediated by opsin light absorption). Secondary effects of the photon absorption include ATP increase, brief explosion of reactive oxygen species, an increase in nitric

34 oxide, and calcium levels modulation. Tertiary effects include activating a wide range of transcription  
35 factors that lead to improved cell survival, increased proliferation and migration, and synthesis of  
36 proteins. The interaction of photons with CCO has been found primarily due to the photoacceptor  
37 of the binuclear copper center(CuA)[2] in the NIR (700-980nm) range[3]. CCO accepts photons and  
38 transduces photo-signal in the NIR spectrum[4] which is postulated to be the underlying mechanism  
39 of "photobiomodulation" (PBM). The underlying theory suggests that nitric oxide (NO), which inhibits  
40 the enzymatic activity of CCO, can be dissociated by photons absorbed by the CCO that has two  
41 heme and three coppers with different absorption spectra[5]. The dissociation of the inhibitory NO[5],  
42 thereby allowing respiration to resume unhindered, increasing energy production (ATP synthesis) [6].  
43 Consequently, various signaling molecules are activated, including (but not limited to) ROS, cyclic  
44 adenosine monophosphate(cAMP), NO, and calcium. While the underlying mechanisms are still  
45 elusive, it has been seen that the increase in reactive oxygen species (ROS) during PBM may have the  
46 ability to trigger mitochondrial signaling pathways which leads to cytoprotective, anti-oxidant and  
47 anti-apoptotic effects in cells[7].

48 Furthermore, one can not only increase the activity of CCO (primarily at 810nm) but can also  
49 reduce the activity of isolated CCO using two NIR wavelengths (750nm and 950nm)[8]. Therefore, the  
50 light wavelength is important since the efficiency of red (600-700nm) to NIR (700-980nm) spectrum  
51 varies due to their varied ability to modulate CCO and the energy production [9]. The  $\text{Cu}^{2+}$  centers of  
52 CCO are assumed to be one of the causes of the CCO interaction with red and NIR light[10]. However,  
53 CCO shows much higher absorption around the 420 and 450nm[11] in the visible range due to the two  
54 heme groups a and a3[12]. Blue and green light have shown promises in stem cell differentiation[13]  
55 where the effect can be due to light-sensitive ion-channels besides PBM since the transition from  
56 glycolysis to oxidative phosphorylation is also a crucial factor in stem cell differentiation. Nevertheless,  
57 visible spectrum, especially in the blue and green range, poses a considerable challenge in its utility  
58 for targeting deeper tissues due to their low penetration depth [14] where red-NIR spectral range  
59 performs better for non-invasive brain stimulation due to the optical window [15]. In the red-NIR  
60 spectral range, the red spectrum has a lower penetration depth; hence, it is more efficient for skin[16]  
61 or other surface tissues, whereas tNIRS is better suited for non-invasive brain stimulation [1].

62 In this article, we investigated the red-NIR spectral region with the CCO absorption peaks  
63 selected in the range of 600-700nm for red and 760-980nm for NIR. Here, an average power density  
64 of  $5\text{mW cm}^{-2}$  to  $500\text{mWcm}^{-2}$  on the surface of the skin is used for non-invasive brain stimulation.  
65 However, there is a pronounced biphasic dose response, with low light levels having stimulating  
66 effects, while high light levels have inhibitory effects[14] that needs biochemical investigation in  
67 conjunction with computational modeling. As the power density increases, the photothermal effects  
68 needs consideration besides photobiomodulation due to increased tissue heating, which can affect the  
69 biochemical responses and brain excitability. Here, the optical energy leading to tissue heating is based  
70 on the fundamentals of increased absorption of longer wavelengths by water in the tissue[17][18].  
71 Indeed, photothermal neurostimulation using the 1064nm laser at the frontal cortex has been shown  
72 to improve cognitive functions along with neurometabolic activity[9]. Moreover, photothermal  
73 neurostimulation has been shown to be promising to map mesoscale brain connectomes[19].

74 A significant advantage of PBM over photothermal stimulation for non-invasive brain stimulation  
75 is that it is safe without the heating effects and can be advantageous therapeutically[3]. Here, tNIRS has  
76 been shown to increase cerebral blood flow, greater oxygen availability, higher oxygen consumption,  
77 improved ATP production, and enhanced mitochondrial activity. PBM has been found to be safe and  
78 well-tolerated as a potential treatment of depression, anxiety, and cognitive impairment[20][21][22].  
79 Cognitive ability has also been shown to improve after several months of treatment by the light emitting  
80 diode at 633nm (red) and 870nm (near-infrared) in patients with chronic traumatic brain injury[23].  
81 Also, tNIRS has been reported as a possible treatment for ischemic stroke with an application at 808nm  
82 (near-infrared laser)[24]. Moreover, the use of transcranial NIR laser (810nm) in low level light therapy  
83 showed improvement in patients suffering from anxiety and depression[25]. Since increased oxygen

84 consumption occurs during increased neural activity[26], which leads to increased CCO activity, so an  
85 assessment and modulation of CCO activity can open a pathway to monitor and modulate neuronal  
86 activity[27] [28]. Here, redox state-dependent changes in the NIR spectrum is an essential tool for  
87 near-infrared spectroscopy of the oxidation state of CCO[2].

88 In this paper, investigation of the interaction of light with the chromophores that are responsive  
89 to photons in the red-NIR spectral region has been performed. Since there is an increased absorption  
90 of longer wavelengths by water in the tissue, we postulate that NIR light interaction with neural  
91 tissue may have effects of photobiomodulation as well as photothermal neurostimulation which needs  
92 consideration for rational dosing of tNIRS due to the biphasic dose response. Although it has been  
93 reported that tNIRS is a modulator of cortical excitability in healthy human brain[1] which forms the  
94 basis of this paper, however, the exact mechanisms of the neuromodulation has been elusive. In this  
95 paper, we apply computational modeling to dissociate photothermal effects from photobiomodulation  
96 during tNIRS with 810nm while comparing that with the red spectrum (630nm and 700nm) used for  
97 LLLT[16] to investigate the mechanisms underlying neuromodulation [1]. Here, the primary aim is  
98 to better understand the extent of optically induced tissue heating (primarily due to water and fat  
99 absorption) during tNIRS based on the experimental results by Chaieb et al. [1].

## 100 2. Methods

### 101 2.1. Head Model Selection

102 To develop the computational model of light interaction with the chromophores in the human  
103 head by non-invasive approach, a digital brain phantom based on high-resolution brain atlas[29] was  
104 used in the study. From the Colin27 head atlas, the different layers of the brain were segmented to  
105 form layered tissues of the head model[30]. Volume mesh was created from each layer after surface  
106 smoothing using CGAL surface mesh toolbox[31] with each surface having its own mesh criteria and  
107 density. After the multi-layered surface mesh was generated, the volume mesh was generated using  
108 the Delaunay tetrahedralization algorithm[32]. Figure 1 shows the multi-layered head mesh generated  
109 after Delaunay tetrahedralization.

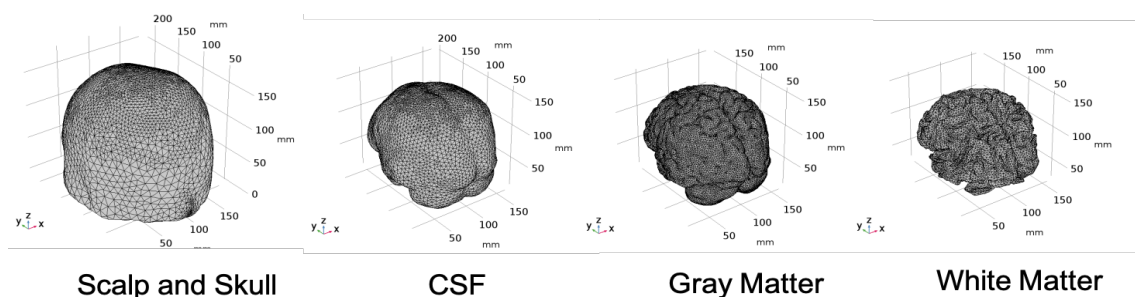

Figure 1. Tetrahedral Mesh for the four-layered Colin27 Head Model

110 The details of the mesh components of the complete four-layered Colin27 head model is given in  
111 table 1.

| Mesh Components      | Number of Mesh Components | Aspect Ratio |
|----------------------|---------------------------|--------------|
| Nodes                | 58131                     | —            |
| Triangular Faces     | 166792                    | 0.0003       |
| Tetrahedral Elements | 917075                    | 0.0000044    |

Table 1. Details of Mesh Components of the four-layered Colin27 Head Model

## 112 2.2. Geometry and domain assignment

113 The tetrahedral mesh was imported to COMSOL, a Finite Element Method(FEM) simulation  
114 software, as a CAD model and each layer was designated as a domain and corresponding optical  
115 properties were assigned to each domain. The domains are as follows:

- 116 • Domain 1: Combined scalp and skull
- 117 • Domain 2: Cerebrospinal Fluid
- 118 • Domain 3: Gray Matter
- 119 • Domain 4: White Matter

## 120 2.3. Simulation of Radiative Transfer Equation using Diffusion Approximation

Photon transport in scattering media, such as biological tissues, is generally modeled using the radiative transfer equation (RTE)[33] due to its more accurate solution for highly scattering medium as in the case of brain tissues [34] and higher computational efficiency for complex medium[35][36]. The tetrahedral mesh generated was converted into a CAD file and imported to COMSOL. After importing the mesh to COMSOL, the computation of photon propagation was solved through the diffusion approximation of the RTE. The second order partial differential equation(eqn. 1) describes the time behavior of photon fluence rate distribution in a low-absorption high-scattering medium.

$$\left(\frac{1}{v} \frac{\partial}{\partial t} + \hat{S} \nabla + \mu_a(r) + \mu_s'(r)\right)L(r, \hat{S}, t) = Q(r, \hat{S}, t) + \mu_t(r) \int f(\hat{S}, \hat{S}', r)L(r, \hat{S}', t)d^2\hat{S} \quad (1)$$

Here,  $\mu_a$ ,  $\mu_s'$ , and  $\mu_t$  are the absorption, reduced scattering and total attenuation coefficients, respectively,  $L(r, \hat{S}, t)$ , the radiance at position  $r$  with direction of propagation  $\hat{S}$ ,  $v$  the velocity of light through the medium ( $v = c/n$  where  $c$  is the velocity of light in vacuum and  $n$  the refractive index of the medium),  $Q(r, \hat{S}, t)$  the source term, and  $\hat{S}, \hat{S}', r$  the phase function for scattering. A standard approximation method for the RTE assumes that the radiance in tissue can be represented by an isotropic fluence rate,  $\phi(r, t)$ , plus a small directional flux,  $J(r, t)$ , where:

$$\phi(r, t) = \iint_{4\pi} L(r, \hat{S}, t) d\omega \quad (2)$$

$$J(r, t) = \iint_{4\pi} L(r, \hat{S}, t) \hat{S} d\omega \quad (3)$$

The final diffusion approximation of RTE, i.e., diffusion equation, is derived as:

$$\frac{1}{v} \frac{\partial \phi(r, t)}{\partial t} - \nabla D(r) \nabla \phi(r, t) + \mu_a(r) \phi(r, t) = Q_0(r, t) \quad (4)$$

where  $D(r)$  is defined as:

$$D(r) = \frac{1}{\sqrt{3 \{ \mu_a(r) + \mu_s'(r) \}}} \quad (5)$$

The  $\mu_s'$  is the reduced scattering coefficient and is obtained from equation 6:

$$\mu_s' = \mu_s(1 - g) \quad (6)$$

121 where  $g$  is the anisotropy factor.

The diffusion equation is solved by using the COMSOL Multiphysics software using the Partial Differentiation Equation (PDE) toolbox (comparison with Monte Carlo simulation shown in the supplementary material 1). The entire head model had four domains: scalp and skull combined, CSF, gray matter, and white matter, as listed in table 2. The physics was applied to each domain at steady state with the initial condition being zero. The source term was taken from the published

literature[1] where the power density was 500mW/cm<sup>2</sup> at the scalp surface as presented by Chaieb and colleagues[1]. The head model was assumed to be surrounded by air at room temperature(25°C). We placed our sources at the air-tissue interface, which is at the scalp, following Chaieb and colleagues[1]. The boundary condition here is as follows:

$$\frac{\partial\phi(r,z)}{\partial z} = \frac{\alpha}{2D}\phi(r,z) + g\frac{\mu_s}{\mu_a + \mu_s}L_0 \quad (7)$$

122 The optical properties, namely scattering coefficient at these wavelengths have been reported in  
 123 various prior works [37] [38]. The absorption coefficients of the tissues are calculated as the summation  
 124 of the absorption coefficient due to the contribution of each component of interest in the corresponding  
 125 tissue[39]. The optical properties for the whole tissues at the three wavelengths used in the study are  
 126 given in table 2.

| Domains             | Absorption Coefficient<br>(1/m) |       |       | Reduced Scattering Coefficient<br>(1/m) |       |       |
|---------------------|---------------------------------|-------|-------|-----------------------------------------|-------|-------|
|                     | 630nm                           | 700nm | 810nm | 630nm                                   | 700nm | 810nm |
| Scalp and Skull     | 19                              | 13    | 16    | 858                                     | 900   | 760   |
| Cerebrospinal Fluid | 4                               | 4     | 2.6   | 250                                     | 250   | 250   |
| Gray Matter         | 127.25                          | 62.91 | 57.09 | 990                                     | 880   | 746   |
| White Matter        | 66.11                           | 32.52 | 20.77 | 4400                                    | 4356  | 4070  |

**Table 2.** Whole tissue optical properties of each layer in the head model at the three wavelengths

127 The reduced scattering coefficients are calculated based on the scattering coefficient and the  
 128 anisotropy factor (eqn. 6). The anisotropy factor,  $g = 0.89$  has been assumed for all the tissue layers.  
 129 Although literatures have shown that diffuse reflection occurs at the skin surface, in this paper, the  
 130 reflection effects have been excluded.

#### 131 2.4. Optically induced thermal effects modeled using bio-heat transfer mechanism

The thermal effect due to the absorbed incident light is modeled using the bio-heat transfer mechanism[40]. The algorithm analyzes the temperature distribution and heating profile when the heat is applied to the tissue. The Penne's Bio-heat equation(eq. 8) is used to model this phenomenon for localized and distributed energy source.

$$\rho c \frac{\partial T(\vec{r}, t)}{\partial t} = K \nabla^2 T(\vec{r}, t) + \rho_b \omega_b c_b [T_a - T(\vec{r}, t)] + Q_{met} + Q_r(\vec{r}, t) \quad (8)$$

Here,  $\rho$ (kgm<sup>-3</sup>) is the tissue density,  $c$  is specific heat of the tissue(kJ/kg/K),  $K$  is thermal conductivity,  $c_b$ (3664J/kg.°C) is blood specific heat,  $\omega_b$  is blood volumetric perfusion rate,  $T_a$  is the arterial blood temperature(37°C),  $\rho_b$ (1050kgm<sup>-3</sup>) is the blood density and  $Q_{met}$  and  $Q_r$  are the volumetric metabolic heat and the external spatial heating respectively. The heat source term is related to the local fluence rate and tissue absorption coefficient[41] as follows:

$$Q_r(\vec{r}, t) = \mu_a \phi(\vec{r}, t) \quad (9)$$

132 The bio-heat physics is applied with the different tissue components having their respective thermal  
 133 and blood perfusion properties. The thermal and the blood perfusion parameters are taken from[42] to  
 134 be used for the computation of the bio-heat transfer, as shown in table 3 and 4.



| Tissues | Thermal Conductivity<br>( $W/m \cdot ^\circ C$ ) | Density<br>( $kg/m^3$ ) | Metabolic Heat<br>( $W/m^3$ ) |
|---------|--------------------------------------------------|-------------------------|-------------------------------|
| Scalp   | 0.342                                            | 1100                    | 363                           |
| Skull   | 1.15                                             | 1990                    | 70                            |
| CSF     | 0.61                                             | 0                       | 0                             |
| Brain   | 0.57                                             | 0.08                    | 10437                         |

**Table 3.** Thermal Properties of Brain Tissues

| Tissues             | Blood Specific Heat<br>( $J/kg \cdot K$ ) | Blood Perfusion<br>( $1/s$ ) | Blood Density<br>( $kg/m^3$ ) | Metabolic Heat Source<br>( $W/m^3$ ) |
|---------------------|-------------------------------------------|------------------------------|-------------------------------|--------------------------------------|
| Scalp               | 3600                                      | 0.00143                      | 1050                          | 363                                  |
| Skull               | 3600                                      | 0.000143                     | 1050                          | 70                                   |
| Cerebrospinal Fluid | 3600                                      | 0                            | 1050                          | 0                                    |
| Brain               | 3600                                      | 0.08                         | 1050                          | 10437                                |

**Table 4.** Blood perfusion parameters for layers in the head model

135 The boundary condition was applied at the skin surface. It was assumed that there is heat loss  
 136 at the skin surface by convection to ambient[42]. For the whole scalp(skin), the convective heat flux  
 137 value was assumed to be  $4W/m^2 \cdot ^\circ C$ [43].

### 138 2.5. Investigation of Individual Chromophore Absorption in the Tissue

139 Absorption of red or near-infrared photons by cytochrome C oxidase (unit IV of the mitochondrial  
 140 respiratory chain) has been established by prior works[44][45]. In this section, we investigated the  
 141 absorption by CCO at 630nm, 700nm, and 810nm wavelengths, which can cause its activation and may  
 142 lead to photobiomodulation in the gray matter[44]. Besides CCO, we also investigated other major  
 143 chromophores in the gray matter along with the investigation of water absorption. Chromophores  
 144 present in the gray matter that were investigated in this section are as follows:

- 145 • Oxyhemoglobin
- 146 • Deoxyhemoglobin
- 147 • Cytochrome c oxidase(reduced and oxidized state)
- 148 • Lipid

149 Figures 2[46],3[47],4[48] and 5[49] shows the absorption spectra of two states of hemoglobin, two states  
 150 of cytochrome c oxidase and lipid respectively. In figure 4, the main plot shows the absorbance due to  
 151  $4.9\mu M$  of CCO and the inset shows the absorbance due to five times the concentration of CCO[48].

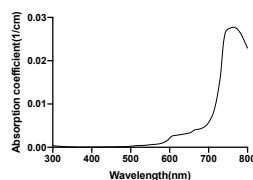

**Figure 2.** Water absorption spectrum

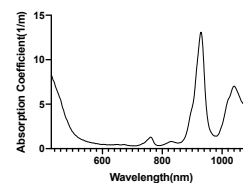

**Figure 3.** Lipid absorption spectrum

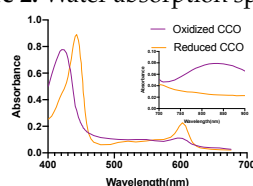

**Figure 4.** Cytochrome c Oxidase absorption spectrum

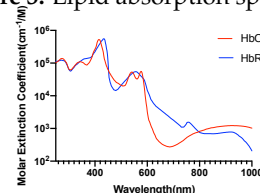

**Figure 5.** Hemoglobin absorption spectrum

152 **2.6. Optical Parameters of Individual Chromophores**

153 The three wavelengths, 630nm, 700nm, and 810nm in the red and the NIR spectral regions, have  
 154 been reported to be promising for photobiomodulation[44]. The two reported wavelengths were  
 155 chosen from red (630nm, 700nm) and one in NIR (810nm) spectral region.  
 156 The water has very low absorption in the red and near-infrared spectrum, although it increases with  
 157 increasing wavelength. Calculation of tissue absorption specifically due to water was performed by  
 158 obtaining the value of the absorption coefficient of pure water at the three wavelengths[46][50][51].  
 159 Since 75% water per unit volume (i.e., volume fraction) is present in brain tissues, hence,  $0.75\mu_a$   
 160 is the absorption coefficient of the tissue specifically due to water[52] [more details provided in the  
 161 supplementary materials]. The percentage of the dry weight of lipid in gray and white matter[53]  
 162 (i.e., mass fraction), density of gray and white matter along with the specific absorbance of lipid[47]  
 163 contribute to the absorption coefficient of the tissue specifically due to lipid. The absorption due to  
 164 hemoglobin in the brain tissue is dependent on cerebral blood volume[54] and was calculated based  
 165 on the volume fraction of the blood in the cerebral tissue, hemoglobin oxygen saturation of mixed  
 166 arterio-venous vasculature, and the absorption coefficient of pure oxy and deoxyhemoglobin [55].  
 167 The molar concentration of oxidized and reduced CCO (in mM) were first obtained for the gray and  
 168 white matter[56]. The absorption coefficient of 1mM of CCO was obtained [2] based on which the  
 169 tissue absorption coefficient due to oxidized and reduced CCO was calculated. The calculations of the  
 170 absorption coefficients are provided in the Supplementary Materials.

| Components                    | Absorption Coefficient<br>(1/m) |       |       |              |       |       |
|-------------------------------|---------------------------------|-------|-------|--------------|-------|-------|
|                               | Gray Matter                     |       |       | White Matter |       |       |
|                               | 630nm                           | 700nm | 810nm | 630nm        | 700nm | 810nm |
| Water                         | 0.26                            | 0.5   | 1.66  | 0.23         | 0.43  | 1.45  |
| Fat                           | 0.04                            | 0.03  | 0.05  | 0.08         | 0.06  | 0.1   |
| Oxyhemoglobin                 | 14.06                           | 12.17 | 22.44 | 3.37         | 2.92  | 5.38  |
| Deoxyhemoglobin               | 73                              | 34.2  | 15.48 | 59.92        | 28.11 | 12.72 |
| Oxidized Cytochrome c Oxidase | 35.64                           | 14.04 | 16.2  | 2.34         | 0.9   | 1.1   |
| Reduced Cytochrome c Oxidase  | 4.25                            | 1.97  | 1.26  | 0.13         | 0.06  | 0.04  |

**Table 5.** Absorption Coefficient of gray and white matter due to the specific chromophores based on their concentration

171 The whole tissue absorption coefficient is given in table 6.

| Components   | Absorption Coefficient<br>(1/m) |       |       |              |       |       |
|--------------|---------------------------------|-------|-------|--------------|-------|-------|
|              | Gray Matter                     |       |       | White Matter |       |       |
|              | 630nm                           | 700nm | 810nm | 630nm        | 700nm | 810nm |
| Whole Tissue | 127.25                          | 62.91 | 57.09 | 66.11        | 32.52 | 20.77 |

**Table 6.** Absorption Coefficient of gray and white matter due to total contribution of all components of interest

172 **2.7. Finite Element Analysis**

173 For the simulation of the RTE (eqn.1) coupled with the bio-heat transfer equation (eqn. 8), the  
 174 Finite Element Analysis used the Partial Differential Equation(PDE) toolbox of COMSOL to solve  
 175 the equations based on discretization (Supplementary figure 1). In this case, the head model with  
 176 the four layers has been discretized into more than 917075 tetrahedral elements forming a complete  
 177 mesh. The computation of the partial differential equations is performed at each discrete unit, more  
 178 precisely, at each node of the tetrahedral element of the mesh. The approximation of the solution on the  
 179 entire three-dimensional head model is performed by interpolation of the data in the space between

180 the nodes by the use of quadratic Lagrangian shape function in-built in the COMSOL software. The  
181 source position Cz, according to the 10-20 EEG system, has been chosen as the stimulation site. A point  
182 source of light with power density  $500\text{mW}/\text{cm}^2$  adapted from the literature[1] was assumed at the Cz  
183 position in the head model. The source was a point source of light and was placed at the scalp at the  
184 Cz position, thus being in direct contact with the skin (figure 6). The CAD model of the adult Colin27  
185 human head model was used with each domain (layers) assigned the optical and bioheat parameters  
186 given in tables 2 and 3.

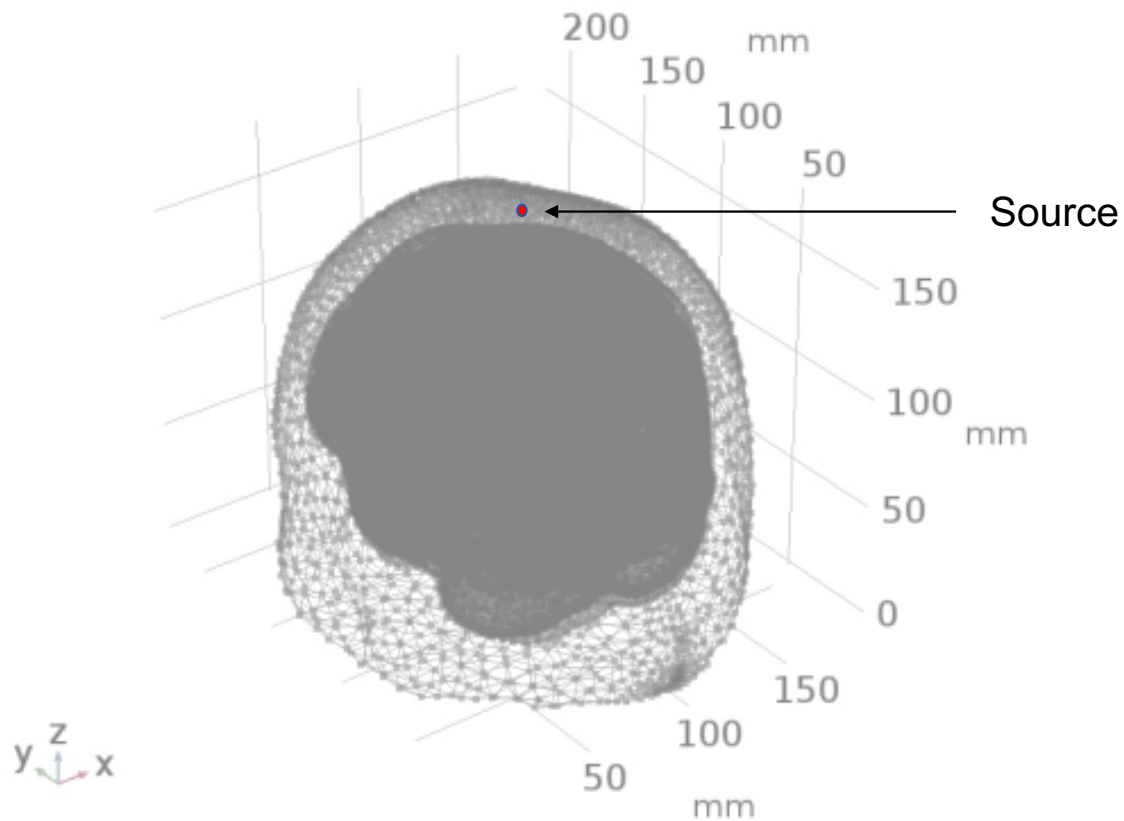

**Figure 6.** Colin27 head model with point source at Cz at scalp surface

187 For simulating the light interaction due to individual chromophores, we investigated the  
188 absorption in the brain tissues due to specific chromophores (based on its absorption coefficient  
189 in the brain tissue). Since scattering is a property attributed by the geometry of the medium (i.e., the  
190 brain tissue), we have assumed the same reduced scattering coefficient of the tissue during all the  
191 chromophore-specific simulation. We used both absorption and scattering properties of the skull and  
192 scalp and the CSF since we wanted to study the fluence rate at the brain tissues after the light traveled  
193 through the scalp, skull, and CSF. Thus, we initially simulated for the brain tissues' contribution to  
194 light absorption by taking the lumped or total (due to all chromophores) absorption coefficients of the  
195 gray and white matter. The results for this specific simulation is presented as 'Whole Tissue'. Note that  
196 the attenuation coefficient is the sum of the absorption coefficient and the scattering coefficient. Here,  
197 scattered light fluence rate is expected to be a constant (for all chromophores in the tissue) while the  
198 fluence attenuation is due to all the chromophores (absorption coefficients lumped in the tissue). To  
199 determine the attenuation due to individual chromophores of interest, we kept the tissue scattering  
200 the same (as in 'Whole Tissue' simulation) while determining the fluence rate attenuation due to  
201 individual chromophores in the tissue. The results were all plotted along a line cut through Cz (figure  
202 7) crossing the layers, thereby, depicting the straight path of light into the tissue.



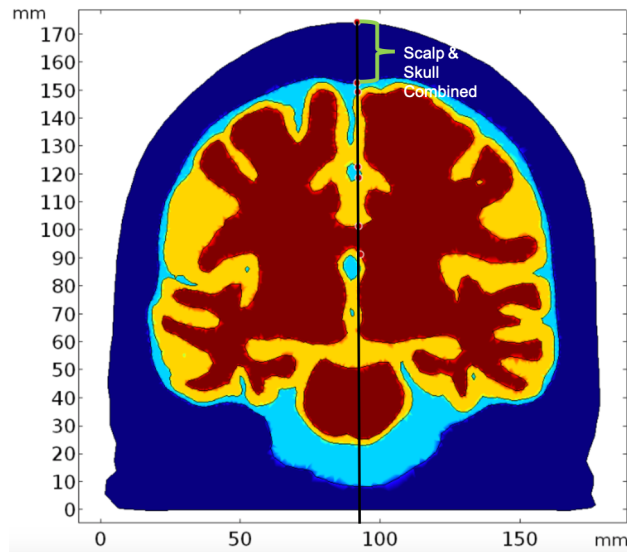

**Figure 7.** The line cut through Cz along which we analyzed the path of light (Deep blue: Scalp and skull domain, Sky blue: CSF domain, Yellow: Gray Matter domain, Red: White Matter domain)

203 The cutline has been drawn through the source which has coordinates 92mm,104mm, and 174mm.  
204 The x-axis on the graphs show the values of z-coordinates of the points along the cutline. Thus, values  
205 of z-coordinates decrease as the light travels further from the source placed at the scalp surface (the  
206 grid of coordinates shown in figure 6 where the z-axis is the depth).

### 207 3. Results

#### 208 3.1. Photothermal effects

209 The optical fluence rate due to absorption and scattering by each layer is obtained from the  
210 solution of the RTE equation (7).

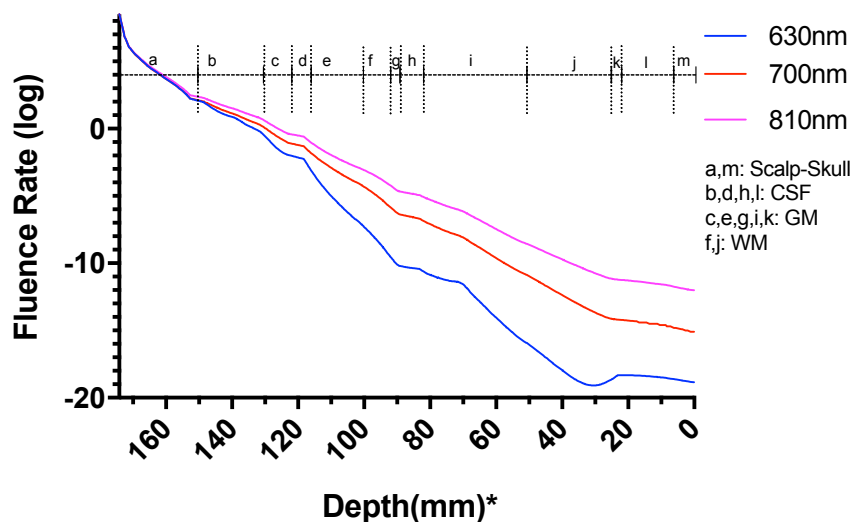

**Figure 8.** Fluence rate at the layers in the Colin27 head model for the three wavelengths; \*: The numbers on the x-axis show the z-coordinates of the points on the cutline

211 Figure 8 shows the normalized (natural logarithm) fluence rate for the 'Whole Tissue' in the tissue  
212 layers for the three wavelengths used for the study along the straight line taken through Cz. It is seen,  
213 that for wavelength 700nm and 810nm, fluence rate is comparatively higher at greater depths (less

214 attenuation) when compared to that at 630nm, i.e., a higher penetration depth near the NIR optical  
215 window. The fractional fluence rate from the scalp surface to gray matter is shown in figure 9 where  
216 we see that minimal amount of light penetrates from the scalp through the skull and cerebrospinal  
217 fluid to the gray matter across a distance of more than 20mm along the cutline (figure 7) showing that  
218 minimal amount-around 0.2% NIR light is able to penetrate the skull.

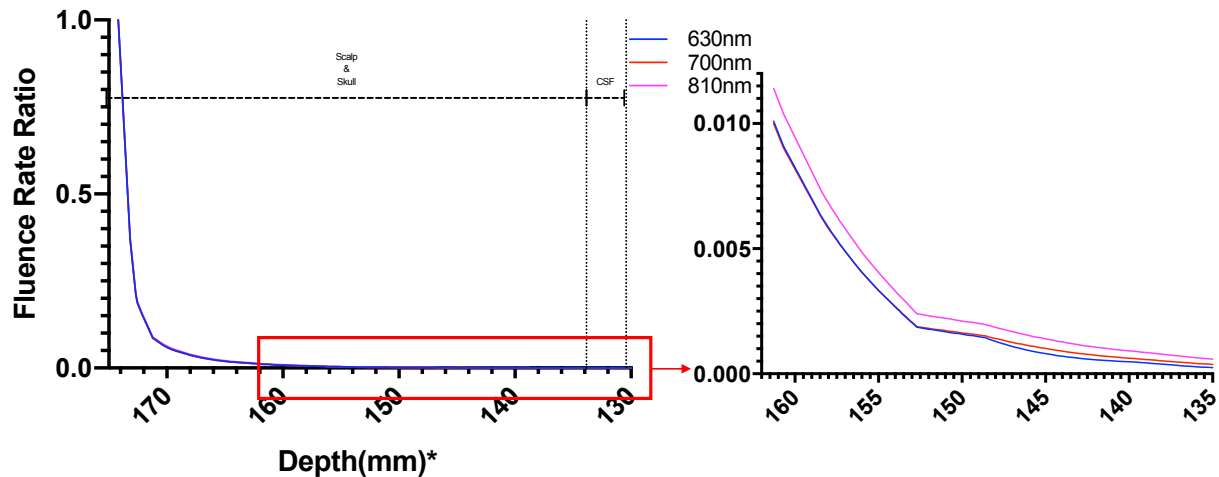

**Figure 9.** Fluence Rate Ratio from Source Gray Matter; \*: The numbers on the x-axis show the z-coordinates of the points on the cutline

219 Figure 10 shows the power absorbed per unit volume by gray matter. The absorbed power has  
220 been assumed as the heat source for the gray matter, causing the temperature alteration.

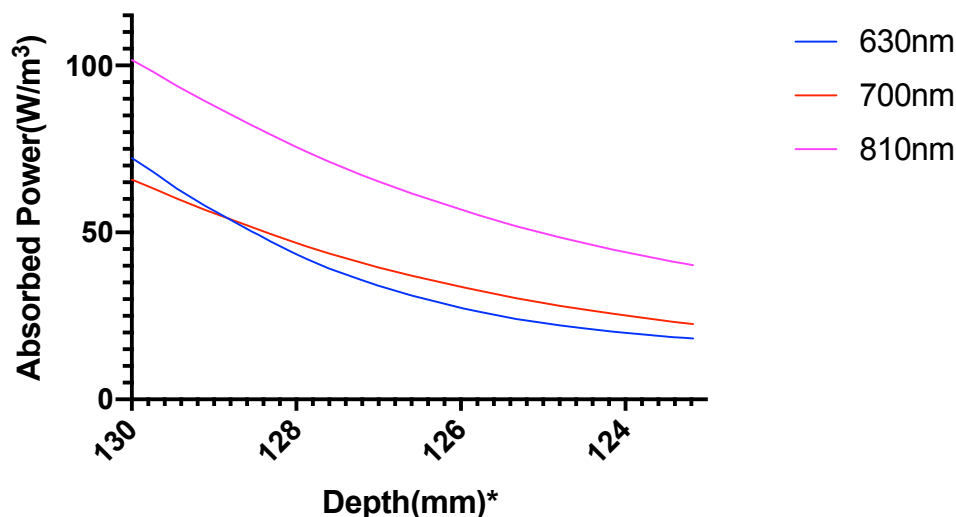

**Figure 10.** Power absorbed per unit volume (heat source) in the gray matter; \*: The numbers on the x-axis show the z-coordinates of the points on the cutline

221 It was seen that 810nm comparatively shows a higher absorption of power at the gray matter, and  
222 thus we hypothesized that this wavelength a better choice for photothermal neuromodulation. We  
223 performed the bioheat simulation for all three wavelengths to verify our hypothesis.

224 The temperature along the line at the Cz location (10-20 EEG system) at different domains of  
225 the head model due to the 630nm, 700nm and 810nm optical stimulation was obtained from bioheat  
226 transfer solution, as shown in Figure 11.

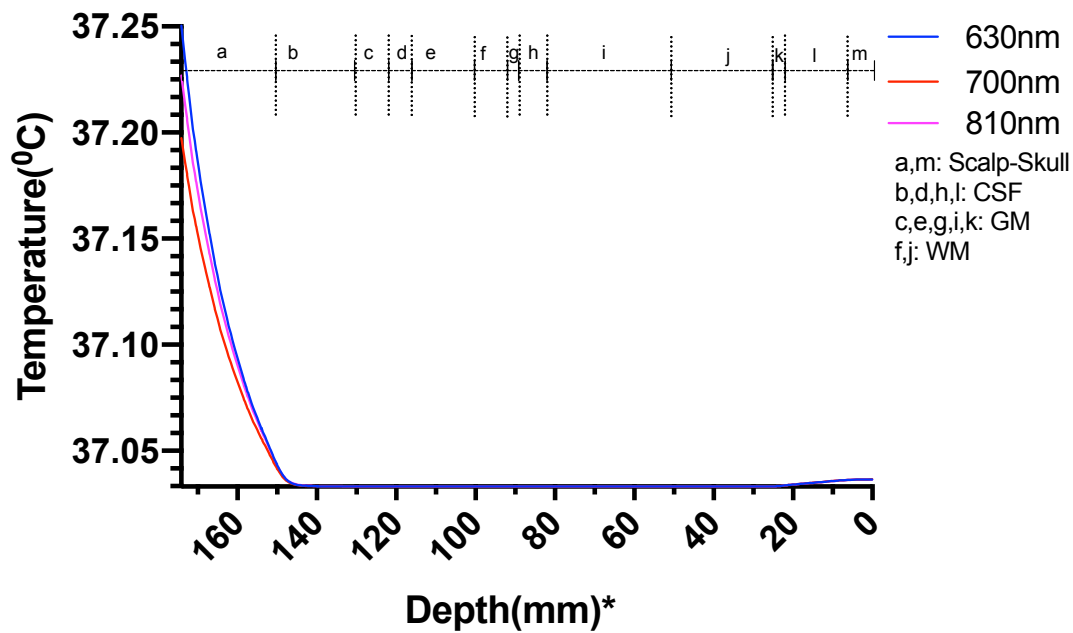

**Figure 11.** Temperature variation along the different layers in the head model plotted along the line through Cz; \*. The numbers on the x-axis show the z-coordinates of the points on the cutline

227 The results showed a temperature rise, at the scalp surface as well as at the other layers, from the  
228 average body temperature of 37 °C. The increase of temperature at the scalp at Cz is less than 0.25 °C  
229 so well within the safety limit (figure 11), but the rise of temperature at the gray matter underlying Cz  
230 area was much lower less than 0.04 °C (figure 12).

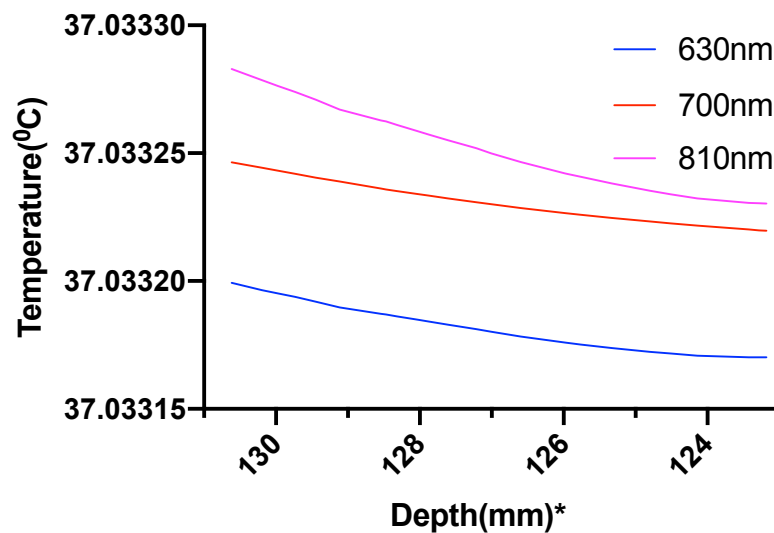

**Figure 12.** Temperature variation in the gray matter plotted along the line through Cz; \*. The numbers on the x-axis show the z-coordinates of the points on the cutline

231 The temperature plotted over the volume of gray and white matter and represented through color  
232 map further elucidates the temperature distribution over the entire volume of the two domains, as  
233 shown in figure 13.

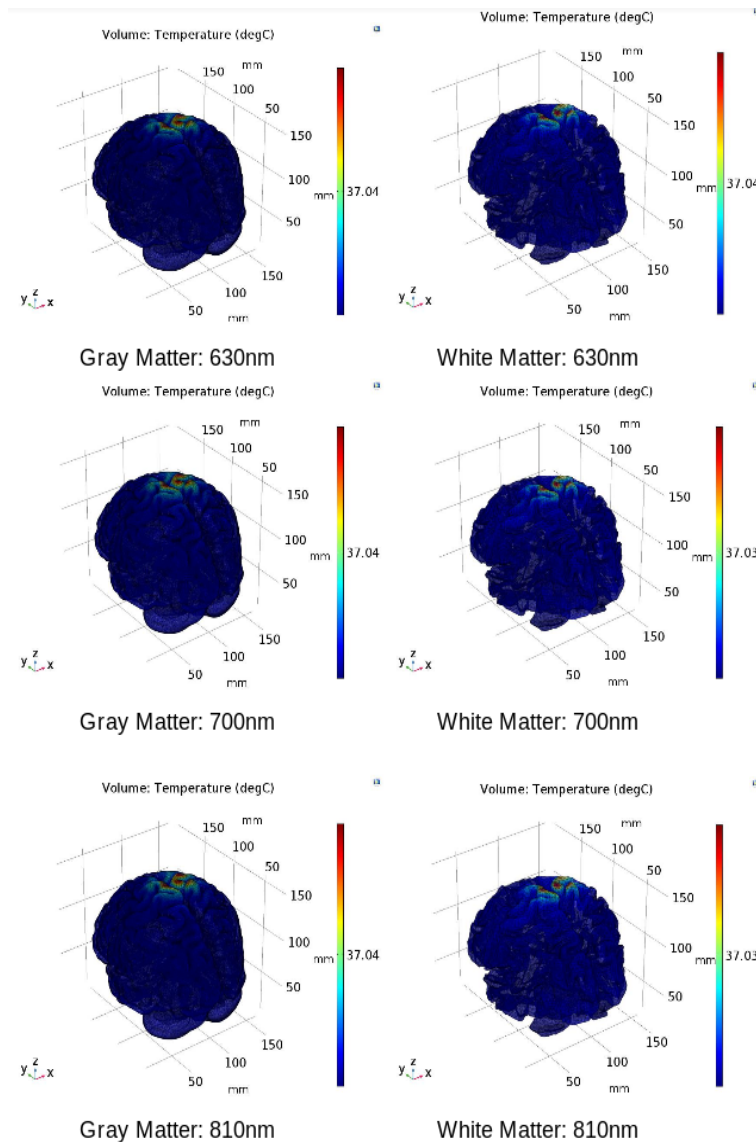

**Figure 13.** Temperature distribution in the gray and white matter volume

234 In figure 13, it can be seen that at all the wavelengths, there is no considerable increase in  
235 temperature in the gray and white matter and temperature is very close to the average body  
236 temperature. In both cases, the photothermal effect leading to changes in neural excitability is not  
237 expected at such a small change in temperature. Hence, we investigated the other aspect of light  
238 interaction with the neural tissue, i.e., photobiomodulation.

### 239 3.2. Photobiomodulation

240 The light interaction with the chromophores in the gray and white matter (see Table 5) was  
241 performed to analyze how the three wavelengths (630nm, 700nm, and 810 nm) in different spectral  
242 regions are absorbed in the brain tissues that can lead to photobiomodulation. The fluence rate has  
243 been computed along the cutline shown in figure 7.

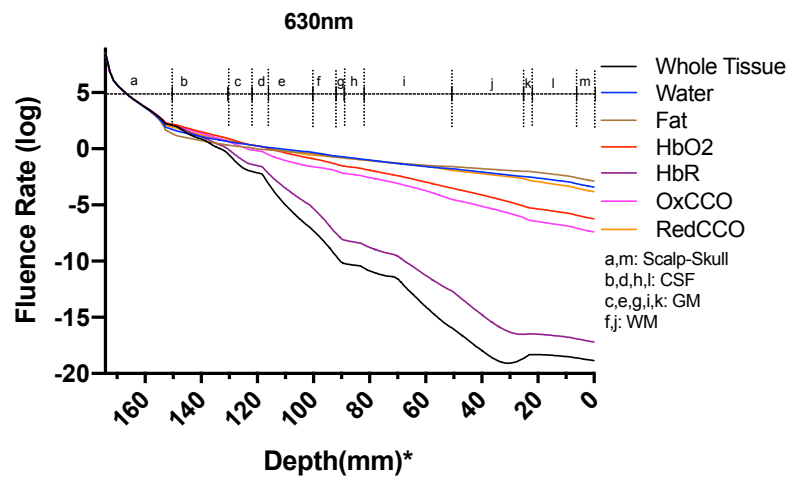

**Figure 14.** Fluence rate through the different layers of the head model at 630nm due to individual components at the gray and white matter; \*: The numbers on the x-axis show the z-coordinates of the points on the cutline

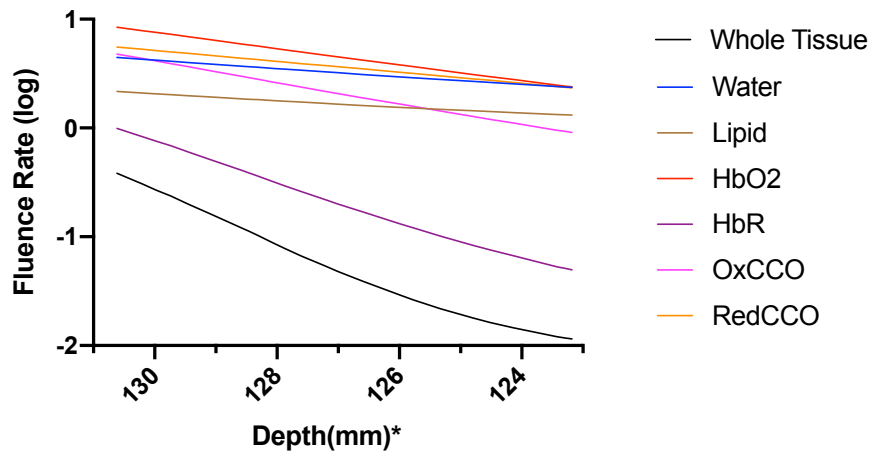

**Figure 15.** Fluence rate at 630nm in the gray matter due to individual components; \*: The numbers on the x-axis show the z-coordinates of the points on the cutline

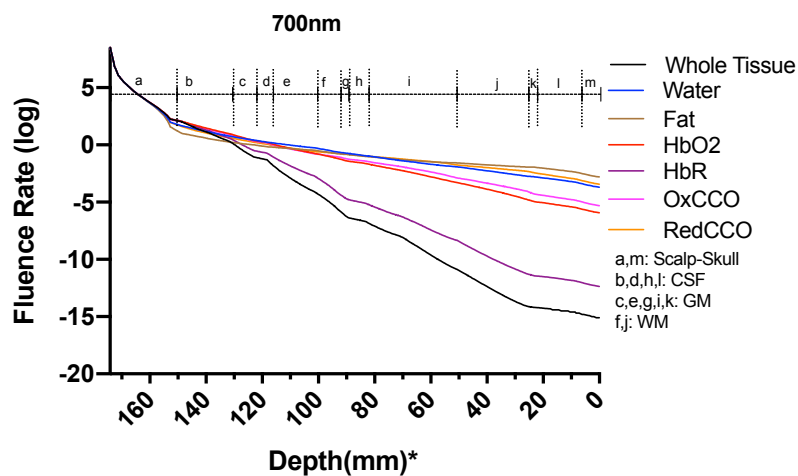

**Figure 16.** Fluence rate through the different layers of the head model at 700nm due to individual components at the gray and white matter; \*: The numbers on the x-axis show the z-coordinates of the points on the cutline

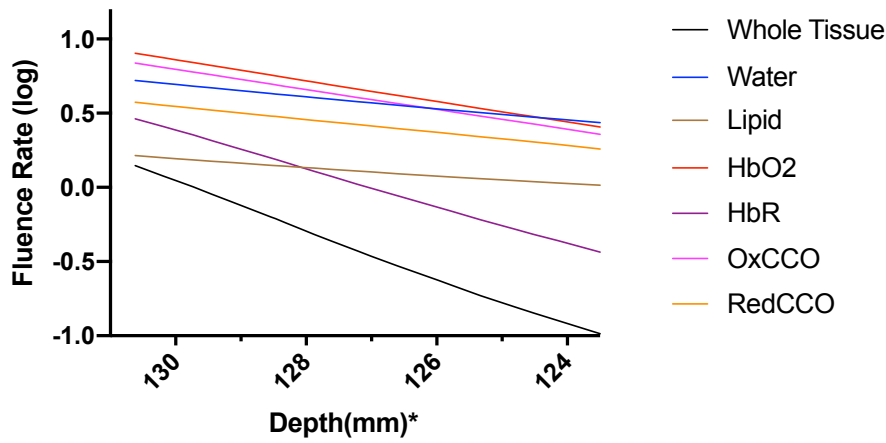

**Figure 17.** Fluence rate at 700nm in the gray matter due to individual components; \*: The numbers on the x-axis show the z-coordinates of the points on the cutline

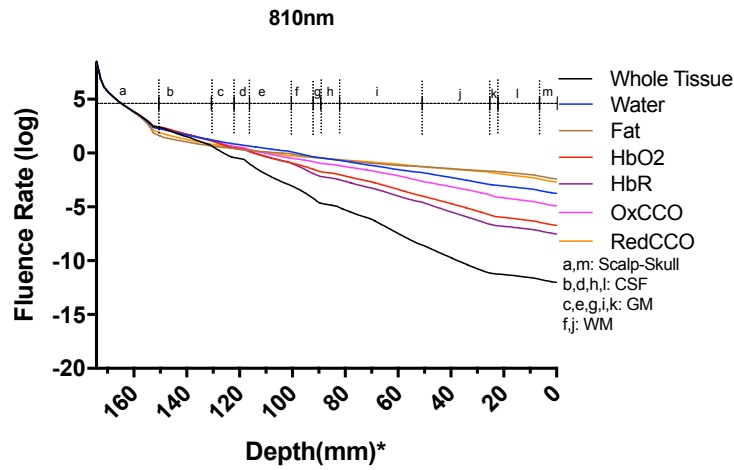

**Figure 18.** Fluence rate through the different layers of the head model at 810nm due to individual components at the gray and white matter; \*: The numbers on the x-axis show the z-coordinates of the points on the cutline

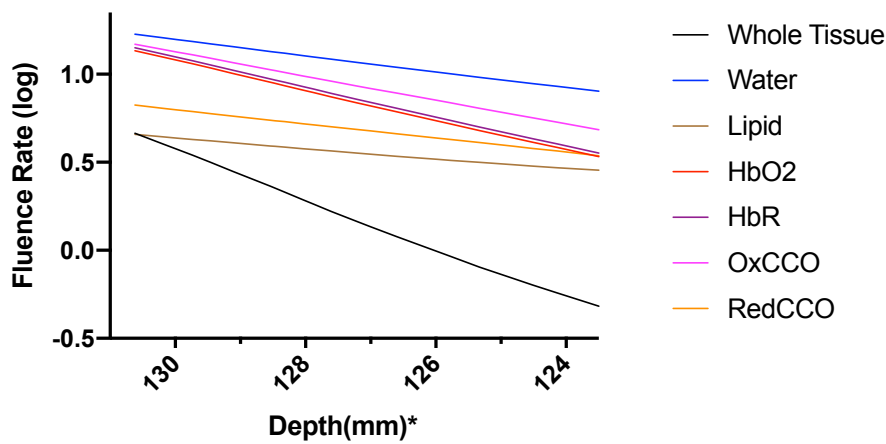

**Figure 19.** Fluence Rate at 810nm in the gray matter due to individual components; \*: The numbers on the x-axis show the z-coordinates of the points on the cutline



244 The fluence rate distribution due to absorption by specific chromophores (at the gray and white  
245 matter) through the different layers of the head model is shown in figures 14, 15, 16,17, 18 and 19.  
246 Figures 14, 16 and 18. These show how the fluence rate varied in the layers along the surface normal  
247 through Cz. Our simulations support the prior findings that around 1-5% of light in the NIR spectral  
248 region reaches the gray matter [1]. We plotted the curve by taking the logarithm of the computed  
249 absolute fluence rate across different layers to better visualize the attenuation for each chromophore.  
250 An important finding when comparing between 630nm, 700nm, and 810nm is that cytochrome c  
251 oxidase contributes significantly in the attenuation of light at the gray matter, thus showing lower flux.  
252 Moreover, 810nm was found to have better depth penetration (figure 9), and so this wavelength is seen  
253 to be more promising than 630nm and 700nm for non-invasive brain stimulation.

#### 254 4. Systematic Model Errors

255 The simulated model shown here is a realistic head model based on the Colin27 head atlas. The  
256 mathematical model could show errors, mainly due to simplifications. The errors may be as follows:

- 257 • In our model, the brain has been assumed as a highly scattering medium which is not true for  
258 CSF which is a low scattering medium where RTE can produce erroneous results[57](Comparison  
259 between RTE and Monte Carlo has been shown in Supplementary material).
- 260 • Another error is related to computational limitation during the FEM modeling and discretization.  
261 There were limitations of accessible memory. Although enhancing resolution leads to better  
262 convergence of FEM results[58], but computational limitation restricted us to the standard  
263 COMSOL mesh refining process.
- 264 • The reflection effects due to light interaction have been excluded from the simulations to focus  
265 on light interaction with tissues due to absorption and scattering.
- 266 • The optical properties of the tissues in the head model vary significantly based on prior works.  
267 We selected a set of optical parameters from review literature[39][56][49]. We did not consider  
268 chromophores in the skin such as melanin, lipofuscin.
- 269 • The simulation of the Bioheat Transfer assumed that the heat loss at the skin surface is due to  
270 convection and radiative heat loss was considered insignificant at that temperature.

#### 271 5. Discussion and Conclusion

272 The computational pipeline aimed to investigate the temperature change induced by the light  
273 absorption at the three wavelengths, 630nm, 700nm, and 810nm, as well as the absorption by the  
274 chromophores in the neural tissue. In this multiphysics modeling of light diffusion with bioheat  
275 transfer, we found that the temperature change in the scalp is well within 1 degree Celsius as reported  
276 by Chaieb and colleagues [1] for a light source of power density  $500mW/cm^2$  at the scalp surface.  
277 As the light gets attenuated while propagating through the skull and cerebrospinal fluid (CSF) to  
278 reach the gray matter(0.2% reaches the gray matter; hence less than 1%), the low fluence rate leads  
279 to insignificant heating in the gray matter. Here, we assumed the initial body temperature at  $37^{\circ}C$ ,  
280 and the temperature increase at the Cz area was found to be around  $0.033^{\circ}C$  at the gray matter-CSF  
281 interface. The sharp decrease in the fluence rate as the light propagated further into the gray matter is  
282 shown in figure 12.

283 Prior works on brain temperature that was assessed on resting clinical patients showed an average  
284 brain temperature ranging around  $36.9 \pm 0.4^{\circ}C$ [59]. Brain activity has been shown to be associated with  
285 the rise in brain temperature. Studies have suggested that temperature changes of even less than  $1^{\circ}C$   
286 can result in functional alterations in the various areas of the nervous system[60], indicating the high  
287 thermal sensitivity of the brain. Thus, the temperature is an important active and dynamic variable  
288 that can modulate brain activity and needs to be monitored during stimulation. The brain, being at a  
289 typically higher temperature than the body, is cooled down by perfusing blood, which was considered  
290 in our modeling of thermal changes through bioheat transfer. Here, blood perfusion acts as a heat sink,  
291 thus cooling the brain down. Therefore, the temperature change in biological tissue is significantly

292 dependent on the bioheat, which is further dependent on the heat source and the blood perfusion  
293 sink. The simulated results showed insignificant temperature change ( $0.033^{\circ}\text{C}$ ) to cause photothermal  
294 neuromodulation. Hence, the chromophore simulations suggest a possible photobiomodulation effect  
295 of the NIR light interaction with the tissue. The results obtained from the simulation of the absorption  
296 by each chromophore, including lipid and water, elucidated the fact that besides water and lipid, light  
297 attenuation in the gray matter is due to the absorption of NIR light by the reduced and oxidized CCO.  
298 In fact, for 630nm, 700nm, and 810nm wavelengths, we found that the two forms of CCO are the two  
299 major contributors to light attenuation besides water, lipid, and hemoglobin. Thus, we can conclude  
300 from the three categories of data that neuromodulation of the gray matter by photothermal effect  
301 is not significant with  $500\text{mW cm}^{-2}$  at the scalp surface at 630nm and 700nm (red spectral region)  
302 and 810nm (near-infrared spectral region). However, the biochemical effects of CCO absorption need  
303 further investigation in conjunction with the heating effects since a small, steady state temperature  
304 change can affect the kinetics of photobiomodulation. Our simulation data comparing the fluence rate  
305 attenuation among 630nm, 700nm, and 810nm also showed that 810nm has higher penetration depth  
306 than the 630nm and 700nm, which supports the use of tNIRS for non-invasive brain stimulation.

### 307 **Acknowledgments:**

308 We thank the reviewers for their insightful comments and suggestions that improved the work  
309 presented in the paper. We also thank Steffy Rodriguez (undergraduate student of Biomedical  
310 Engineering at the University at Buffalo) for proofreading the manuscript.

### 311 **Abbreviations**

312 The following abbreviations are used in this manuscript:

|     |       |                                        |
|-----|-------|----------------------------------------|
| 313 | PBM   | Photobiomodulation                     |
|     | CCO   | Cytochrome c oxidase                   |
|     | ROS   | Reactive Oxygen Species                |
|     | FEM   | Finite Element Method                  |
| 314 | NIR   | Near Infrared                          |
|     | RTE   | Radiative Transfer Equation            |
|     | PDE   | Partial Differential Equation          |
|     | tNIRS | transcranial Near Infrared Stimulation |

### 315 **References**

- 316 1. Chaieb, L.; Antal, A.; Masurat, F.; Paulus, W. Neuroplastic effects of transcranial near-infrared stimulation  
317 (tNIRS) on the motor cortex. *Frontiers in behavioral neuroscience* **2015**, *9*, 147.
- 318 2. Bale, G.; Elwell, C.E.; Tachtsidis, I. From Jöbsis to the present day: a review of clinical near-infrared  
319 spectroscopy measurements of cerebral cytochrome-c-oxidase. *Journal of biomedical optics* **2016**, *21*, 091307.
- 320 3. Wong-Riley, M.T.; Liang, H.L.; Eells, J.T.; Chance, B.; Henry, M.M.; Buchmann, E.; Kane, M.; Whelan,  
321 H.T. Photobiomodulation directly benefits primary neurons functionally inactivated by toxins role of  
322 cytochrome c oxidase. *Journal of Biological Chemistry* **2005**, *280*, 4761–4771.
- 323 4. Karu, T.I. Multiple roles of cytochrome c oxidase in mammalian cells under action of red and IR-A radiation.  
324 *IUBMB life* **2010**, *62*, 607–610.
- 325 5. Lane, N. Cell biology: power games, 2006.
- 326 6. Poyton, R.O.; Ball, K.A. Therapeutic photobiomodulation: nitric oxide and a novel function of  
327 mitochondrial cytochrome c oxidase. *Discovery medicine* **2011**, *11*, 154–159.
- 328 7. Waypa, G.B.; Smith, K.A.; Schumacker, P.T. O<sub>2</sub> sensing, mitochondria and ROS signaling: the fog is lifting.  
329 *Molecular aspects of medicine* **2016**, *47*, 76–89.
- 330 8. Sanderson, T.H.; Wider, J.M.; Lee, I.; Reynolds, C.A.; Liu, J.; Lepore, B.; Tousignant, R.; Bukowski, M.J.;  
331 Johnston, H.; Fite, A.; others. Inhibitory modulation of cytochrome c oxidase activity with specific  
332 near-infrared light wavelengths attenuates brain ischemia/reperfusion injury. *Scientific reports* **2018**,  
333 *8*, 3481.

- 334 9. Barrett, D.W.; Gonzalez-Lima, F. Transcranial infrared laser stimulation produces beneficial cognitive and  
335 emotional effects in humans. *Neuroscience* **2013**, *230*, 13–23.
- 336 10. Amaroli, A.; Ferrando, S.; Benedicenti, S. Photobiomodulation Affects Key Cellular Pathways of all  
337 Life-Forms: Considerations on Old and New Laser Light Targets and the Calcium Issue. *Photochemistry*  
338 *and photobiology* **2019**, *95*, 455–459.
- 339 11. Michel, B.; Bosshard, H.R. Spectroscopic analysis of the interaction between cytochrome c and cytochrome  
340 c oxidase. *Journal of Biological Chemistry* **1984**, *259*, 10085–10091.
- 341 12. Thomson, A.; Brittain, T.; Greenwood, C.; Springall, J. Determination of the heme spin states in cytochrome  
342 c oxidase using magnetic circular dichroism. *FEBS letters* **1976**, *67*, 94–98.
- 343 13. Wang, Y.; Huang, Y.Y.; Wang, Y.; Lyu, P.; Hamblin, M.R. Photobiomodulation (blue and green light)  
344 encourages osteoblastic-differentiation of human adipose-derived stem cells: role of intracellular calcium  
345 and light-gated ion channels. *Scientific reports* **2016**, *6*, 33719.
- 346 14. Hamblin, M.R. Mechanisms and applications of the anti-inflammatory effects of photobiomodulation.  
347 *AIMS biophysics* **2017**, *4*, 337.
- 348 15. Haeussinger, F.B.; Heinzl, S.; Hahn, T.; Schecklmann, M.; Ehlis, A.C.; Fallgatter, A.J. Simulation of  
349 near-infrared light absorption considering individual head and prefrontal cortex anatomy: implications for  
350 optical neuroimaging. *PLoS one* **2011**, *6*, e26377.
- 351 16. Avci, P.; Gupta, A.; Sadasivam, M.; Vecchio, D.; Pam, Z.; Pam, N.; Hamblin, M.R. Low-level laser (light)  
352 therapy (LLLT) in skin: stimulating, healing, restoring. *Seminars in cutaneous medicine and surgery*. NIH  
353 Public Access, 2013, Vol. 32, p. 41.
- 354 17. Wells, J.; Kao, C.; Mariappan, K.; Albea, J.; Jansen, E.D.; Konrad, P.; Mahadevan-Jansen, A. Optical  
355 stimulation of neural tissue in vivo. *Optics letters* **2005**, *30*, 504–506.
- 356 18. Schultz, M.; Baumhoff, P.; Maier, H.; Teudt, I.U.; Krüger, A.; Lenarz, T.; Kral, A. Nanosecond laser pulse  
357 stimulation of the inner ear—a wavelength study. *Biomedical optics express* **2012**, *3*, 3332–3345.
- 358 19. Xu, A.G.; Qian, M.; Tian, F.; Xu, B.; Friedman, R.M.; Wang, J.; Song, X.; Sun, Y.; Chernov, M.M.; Cayce, J.M.;  
359 others. Focal infrared neural stimulation with high-field functional MRI: A rapid way to map mesoscale  
360 brain connectomes. *Science advances* **2019**, *5*, eaau7046.
- 361 20. Cassano, P.; Petrie, S.R.; Hamblin, M.R.; Henderson, T.A.; Iosifescu, D.V. Review of transcranial  
362 photobiomodulation for major depressive disorder: targeting brain metabolism, inflammation, oxidative  
363 stress, and neurogenesis. *Neurophotonics* **2016**, *3*, 031404.
- 364 21. Morris, L.D.; Cassano, P.; Henderson, T.A. Treatments for traumatic brain injury with emphasis on  
365 transcranial near-infrared laser phototherapy. *Neuropsychiatric disease and treatment* **2015**, *11*, 2159.
- 366 22. Tian, F.; Hase, S.N.; Gonzalez-Lima, F.; Liu, H. Transcranial laser stimulation improves human cerebral  
367 oxygenation. *Lasers in surgery and medicine* **2016**, *48*, 343–349.
- 368 23. Naeser, M.A.; Saltmarche, A.; Kregel, M.H.; Hamblin, M.R.; Knight, J.A. Improved cognitive function  
369 after transcranial, light-emitting diode treatments in chronic, traumatic brain injury: two case reports.  
370 *Photomedicine and laser surgery* **2011**, *29*, 351–358.
- 371 24. Zivin, J.A.; Albers, G.W.; Bornstein, N.; Chippendale, T.; Dahlof, B.; Devlin, T.; Fisher, M.; Hacke, W.; Holt,  
372 W.; Ilic, S.; others. Effectiveness and safety of transcranial laser therapy for acute ischemic stroke. *Stroke*  
373 **2009**, *40*, 1359–1364.
- 374 25. Schiffer, F.; Johnston, A.L.; Ravichandran, C.; Polcari, A.; Teicher, M.H.; Webb, R.H.; Hamblin, M.R.  
375 Psychological benefits 2 and 4 weeks after a single treatment with near infrared light to the forehead: a  
376 pilot study of 10 patients with major depression and anxiety. *Behavioral and Brain Functions* **2009**, *5*, 46.
- 377 26. Bunce, S.C.; Izzetoglu, M.; Izzetoglu, K.; Onaral, B.; Pourrezaei, K. Functional near-infrared spectroscopy.  
378 *IEEE engineering in medicine and biology magazine* **2006**, *25*, 54–62.
- 379 27. Wong-Riley, M.T. Bigenic regulation of cytochrome c oxidase in neurons and the tight coupling between  
380 neuronal activity and energy metabolism. In *Mitochondrial Oxidative Phosphorylation*; Springer, 2012; pp.  
381 283–304.
- 382 28. von Lüthmann, A.; Addesa, J.; Chandra, S.; Das, A.; Hayashibe, M.; Dutta, A. Neural interfacing  
383 non-invasive brain stimulation with NIRS-EEG joint imaging for closed-loop control of neuroenergetics in  
384 ischemic stroke. 2017 8th International IEEE/EMBS Conference on Neural Engineering (NER). IEEE, 2017,  
385 pp. 349–353.

- 386 29. Collins, D.L.; Zijdenbos, A.P.; Kollokian, V.; Sled, J.G.; Kabani, N.J.; Holmes, C.J.; Evans, A.C. Design and  
387 construction of a realistic digital brain phantom. *IEEE transactions on medical imaging* **1998**, *17*, 463–468.
- 388 30. Tran, A.P.; Fang, Q. Fast and high-quality tetrahedral mesh generation from neuroanatomical scans. *arXiv*  
389 *preprint arXiv:1708.08954* **2017**.
- 390 31. Boissonnat, J.D.; Oudot, S. Provably good sampling and meshing of surfaces. *Graphical Models* **2005**,  
391 *67*, 405–451.
- 392 32. Si, H. TetGen, a Delaunay-based quality tetrahedral mesh generator. *ACM Transactions on Mathematical*  
393 *Software (TOMS)* **2015**, *41*, 11.
- 394 33. L’Huillier, J.P.; Humeau, A. Use of the finite element method to study photon-tissue interactions in  
395 biological media. 17th IMACS Congress, Paris (France).
- 396 34. Liemert, A.; Reitzle, D.; Kienle, A. Analytical solutions of the radiative transport equation for turbid and  
397 fluorescent layered media. *Scientific reports* **2017**, *7*, 3819.
- 398 35. Fang, Q. Mesh-based Monte Carlo method using fast ray-tracing in Plücker coordinates. *Biomedical optics*  
399 *express* **2010**, *1*, 165–175.
- 400 36. Joshi, A.; Rasmussen, J.C.; Sevick-Muraca, E.M.; Wareing, T.A.; McGhee, J. Radiative transport-based  
401 frequency-domain fluorescence tomography. *Physics in Medicine & Biology* **2008**, *53*, 2069.
- 402 37. Yaroslavsky, A.; Schulze, P.; Yaroslavsky, L.; Schober, R.; Ulrich, F.; Schwarzmaier, H. Optical properties of  
403 selected native and coagulated human brain tissues in vitro in the visible and near infrared spectral range.  
404 *Physics in Medicine & Biology* **2002**, *47*, 2059.
- 405 38. Custo, A.; Wells Iii, W.M.; Barnett, A.H.; Hillman, E.M.; Boas, D.A. Effective scattering coefficient of the  
406 cerebral spinal fluid in adult head models for diffuse optical imaging. *Applied optics* **2006**, *45*, 4747–4755.
- 407 39. Jacques, S.L. Optical properties of biological tissues: a review. *Physics in Medicine & Biology* **2013**, *58*, R37.
- 408 40. Valvano, J. Bioheat transfer encyclopedia of medical devices and instrumentation, 2005.
- 409 41. Welch, A.J.; Van Gemert, M.J.; others. *Optical-thermal response of laser-irradiated tissue*; Vol. 2, Springer, 2011.
- 410 42. Datta, A.; Bansal, V.; Diaz, J.; Patel, J.; Reato, D.; Bikson, M. Gyri-precise head model of transcranial direct  
411 current stimulation: improved spatial focality using a ring electrode versus conventional rectangular pad.  
412 *Brain stimulation* **2009**, *2*, 201–207.
- 413 43. Datta, A.; Elwassif, M.; Bikson, M. Bio-heat transfer model of transcranial DC stimulation: comparison of  
414 conventional pad versus ring electrode. 2009 Annual International Conference of the IEEE Engineering in  
415 Medicine and Biology Society. IEEE, 2009, pp. 670–673.
- 416 44. Hamblin, M.R.; Demidova, T.N. Mechanisms of low level light therapy. Mechanisms for low-light therapy.  
417 International Society for Optics and Photonics, 2006, Vol. 6140, p. 614001.
- 418 45. Passarella, S.; Karu, T. Absorption of monochromatic and narrow band radiation in the visible and near IR  
419 by both mitochondrial and non-mitochondrial photoacceptors results in photobiomodulation. *Journal of*  
420 *Photochemistry and Photobiology B: Biology* **2014**, *140*, 344–358.
- 421 46. Pope, R.M.; Fry, E.S. Absorption spectrum (380–700 nm) of pure water. II. Integrating cavity measurements.  
422 *Applied optics* **1997**, *36*, 8710–8723.
- 423 47. van Veen, R.L.; Sterenborg, H.; Pifferi, A.; Torricelli, A.; Cubeddu, R. Determination of VIS-NIR absorption  
424 coefficients of mammalian fat, with time-and spatially resolved diffuse reflectance and transmission  
425 spectroscopy. Biomedical Topical Meeting. Optical Society of America, 2004, p. SF4.
- 426 48. Mason, M.G.; Nicholls, P.; Cooper, C.E. Re-evaluation of the near infrared spectra of mitochondrial  
427 cytochrome c oxidase: implications for non invasive in vivo monitoring of tissues. *Biochimica et Biophysica*  
428 *Acta (BBA)-Bioenergetics* **2014**, *1837*, 1882–1891.
- 429 49. Prahl, S. Tabulated molar extinction coefficient for hemoglobin in water. <http://omlc.ogi.edu/spectra/hemoglobin/summary.html> **1999**.
- 430
- 431 50. Smith, R.C.; Baker, K.S. Optical properties of the clearest natural waters (200–800 nm). *Applied optics* **1981**,  
432 *20*, 177–184.
- 433 51. Sogandares, F.M. The spectral absorption of pure water **1991**.
- 434 52. Shi, L.; Sordillo, L.A.; Rodríguez-Contreras, A.; Alfano, R. Transmission in near-infrared optical windows  
435 for deep brain imaging. *Journal of biophotonics* **2016**, *9*, 38–43.
- 436 53. O’Brien, J.S.; Sampson, E.L. Lipid composition of the normal human brain: gray matter, white matter, and  
437 myelin. *Journal of lipid research* **1965**, *6*, 537–544.

- 438 54. Hamberg, L.M.; Hunter, G.J.; Kierstead, D.; Lo, E.H.; González, R.G.; Wolf, G.L. Measurement of cerebral  
439 blood volume with subtraction three-dimensional functional CT. *American journal of neuroradiology* **1996**,  
440 *17*, 1861–1869.
- 441 55. Prael, S. Optical absorption of hemoglobin. <http://omlc.ogi.edu/spectra/hemoglobin> **1999**.
- 442 56. Johansson, J.D.; Wårdell, K. Intracerebral quantitative chromophore estimation from reflectance spectra  
443 captured during deep brain stimulation implantation. *Journal of biophotonics* **2013**, *6*, 435–445.
- 444 57. Fang, Q.; Boas, D.A. Monte Carlo simulation of photon migration in 3D turbid media accelerated by  
445 graphics processing units. *Optics express* **2009**, *17*, 20178–20190.
- 446 58. Arridge, S.; Schweiger, M.; Hiraoka, M.; Delpy, D. A finite element approach for modeling photon transport  
447 in tissue. *Medical physics* **1993**, *20*, 299–309.
- 448 59. Wang, H.; Wang, B.; Normoyle, K.P.; Jackson, K.; Spittler, K.; Sharrock, M.F.; Miller, C.M.; Best, C.; Llano, D.;  
449 Du, R. Brain temperature and its fundamental properties: a review for clinical neuroscientists. *Frontiers in*  
450 *neuroscience* **2014**, *8*, 307.
- 451 60. Brooks, V.B. Study of brain function by local, reversible cooling. In *Reviews of Physiology, Biochemistry and*  
452 *Pharmacology, Volume 95*; Springer, 1983; pp. 1–109.

453 © 2019 by the authors. Submitted to *Brain Sci.* for possible open access publication under the terms and conditions  
454 of the Creative Commons Attribution (CC BY) license (<http://creativecommons.org/licenses/by/4.0/>).
